# Supplementary material for: Detection and discovery of plant viruses in Disporopsis through high-throughput sequencing
Source: Front Microbiol. 2024 Nov 13;15:1434554. doi: 10.3389/fmicb.2024.1434554 (PMC11599246; doi:10.3389/fmicb.2024.1434554)
Supplement: Supplementary file 1 [file Table_1.XLSX]

## Sheet: Table S1
Table S1	Collection information of Disporopsis samples
	Collection location	Sample host	Number of samples	Sample name
	Kunming,Yunnan	Disporopsis pernyi	13	S21MP20、D-KM-2-13
	Wenchuan,Sichuan	Disporopsis pernyi	19	D-KM-1-19
	Enshi,Hubei	Disporopsis aspersa	15	D-ES-1-15
	Chongqing	Disporopsis	20	D-CQ-1-20
Total			67

## Sheet:  Table S2
Table S2	Primers used for amplification of the complete nucleotide sequence of DCSV
Primers name	Primer sequences	Amplification length（bp）	TM(℃)
DCSV-31F	GCGAACCAATCTTCAAGACTTTCACG	2238	61.5
DCSV-2239R	AAGTTTGTCGACAATCACATCACGCA
DCSV-1475F	CTCAAATTTTGCGCGATCGAACAG	1458	60
DCSV-2933R	CCACCAAATGATGGGATTTACCACG
DCSV-2280F	TTTCATCCGGAAACAAAGAACGCTGA	1591	61.5
DCSV-3871R	CGCGAGTGAATTCAATGAAATGTCCC
DCSV-4730F	TATGGCGAGAGAGTGCAAAGGCTT	1634	62
DCSV-6364R	ACGTAATCCACCGAGGAGGGACTT
DCSV-5862F	GTGCGATTTGTTGACCCTTTAACCGG	2297	62
DCSV-8159R	CGATCATACAGCCATTCAAAACCC
DCSV-8321-CP/F	CATTGAATCGTGGGGTTATGACAAGTTGA	1288	62
DCSV-9609-CP/R	CGGATACGAGGTAAAACCTCACCACACC

## Sheet: Table S3
Table S3	Primers used for amplification of the complete nucleotide sequence of PMaV1-D1
Primers name	Primer sequences	Amplification length（bp）	TM(℃)
PMaV1-D1-1F	CGATCTCAACAATACACGAAAC	630	60
PMaV1-D1-630R	CGTTAAACATTGCCTCAAACT
PMaV1-D1-8F	CACGAAACAAACAAACAAAATCTCAGACTC	2275	60
PMaV1-D1-2283R	ATTTCCCSSGCATTGGTTCAATCCTAT
PMaV1-D1-1848F	ATACAACAGGTACGTTGTTAGGCGG	1686	61
PMaV1-D1-3534R	GTAGTGGTCTAACAAATGTGGATGCTT
PMaV1-D1-3191F	CGAACAGAACTTGCATTGGTGAAAGGAC	1263	62
PMaV1-D1-4454R	CATCCGAGTTACAACCAGTTCCCAATCC
PMaV1-D1-4356F	GAAGAGAGTGCGAGTTCAACACGCAG	1457	64
PMaV1-D1-5813R	GTGCATTCGCTTCTTGCCTTGGTATG
PMaV1-D1-4951F	GCACAGTGAAACAAGCAAGAACAATG	1597	61
PMaV1-D1-6548R	ACTCCCATGTACGTTCGCACTGTTAA
PMaV1-D1-5940F	GGAATGGGAACGAAAACTCGGAATTTTG	2569	61
PMaV1-D1-8509R	GCCACCAAATCACCAAACTCATCTTTCTC
PMaV1-D1-8292F	ACATAAAGGTGTGTTGCATGGAGAAA	594	61
PMaV1-D1-8886R	ATCTAACTGGTCTGGTTTGTACCCCA
PMaV1-D1-8853F	GTGGATCATCTGTTGGGGTACAAACC	772	48
M4	GTTTTCCCAGTCACGAC
M4T	GTTTTCCCAGTCACGAC (T)15

## Sheet: Table S4
Table S4	Primers used for amplification of the complete nucleotide sequence of PMaV1-D2
Primers name	Primer sequences	Amplification length（bp）	TM(℃)
PMaV1-D2-144F	ATGATCGGATCTCTGGCAGTCCCACTC	2206	65
PMaV1-D2-2350R	AAACACAGTGAGCATGTAGCACGCCGT
PMaV1-D-22284F	AACCAATGCTTGGGAAATGGCCAA	2114	62
PMaV1-D2-4398R	CTGGGTACTGCGTGTTGAACTCGC
PMaV1-D2-4181F	GACGAGTGGCTTCGCGTTGCATTAC	1518	60
PMaV1-D2-5699R	TGAGACTAAGCTATTGTTCCAGCGCCC
PMaV1-D2-6642F	ATTCCGCAGAGATTGAAATTTCGA	1418	60.5
PMaV1-D2-8064R	GGTATTGTCCACAACAGTAGAAGGCTG
PMaV1-D2-7662F	CCGAACGTTCACTGCAGCTCCTATTG	1060	60
PMaV1-D2-8722R	CCTCGACAGGGGTCTTGTCCTTCTTC
PMaV1-D2-8656F	GGAAGTTGATGCTGGTGGTGGCGAAT	953	48
PMaV1-D2-M4	GTTTTCCCAGTCACGAC
PMaV1-D2-M4T	GTTTTCCCAGTCACGAC (T)15

## Sheet: Table S5
Table S5	Primers used for amplification of the complete nucleotide sequence of DpLV
Primers name	Primer sequences	Amplification length（bp）	TM(℃)
DpLV-4669F	TGGACATGCTTGATGACTTCTCTGA	591	60.8
DpLV-5260R	CAGTCATTGTCATACTGCCGAATGTC
DpLV-5055F	TCATCATCCTATATTATCAGATGCA	557	56
DpLV-5612R	TACGGCATTCTCCCTAATAGATT
DpLV-5339F	TTATGATGACAGACACCGTCATCT	1189	58
DpLV-6528R	CATTCTGAGATTCCATTTAGAGAAGTC
DpLV-6301F	CGAATTTTTGCGGTACTACCGTACG	1097	62
DpLV-7398R	TAGAGGGTCTGGATGACCTCGATACAG
DpLV-7000F	TTTTGCAACTATGGGAAAAGACTCTAT	793	58
DpLV-7793R	AAGCTCGTTGTATTCTTAAATCCTGAT

## Sheet: Table S6
Table S6	Comparison of nucleotide sequences and polyprotein aa sequences between DCSV and other potyviruses
Scientific Name	Percent Identity（nt）	Query Cover（nt）	Scientific Name	Percent Identity（aa）	Query Cover（aa）
Polygonatum kingianum virus 5（MN873571.1）	0.755	0.84	Polygonatum kingianum virus 5（QVN46485.1）	0.8247	0.95
Polygonatum kingianum virus 2（MK427055.1）	0.695	0.81	Polygonatum kingianum virus 2（QIJ96720.1）	0.7444	0.95
Kalanchoe mosaic virus（KY385304.1）	0.582	0.05	Ranunculus mild mosaic virus（UZH94747.1）	0.5836	0.94
Japanese yam mosaic virus (LC191987.1)	0.57	0.05	Polygonatum kingianum virus 1（QIJ96721.1）	0.5777	0.88
Turnip mosaic virus gene(AB093600.1)	0.573	0.05	Polygonatnum kingianum mottle virus（QVN46486.1）	0.5778	0.91

## Sheet: Table S7
Table S7	Results of genome-wide, coding region amino acid sequence identity between DCSV and members of the genus Portvirus (%)
Virus name	PKgV1	PKgV2	PKgV3	PKgV4	PKgV5	PKgMV	PKgMV	KMV	JYMV	TuMV	RanMMV
	QIJ96721.1	QIJ96720.1	MK427057.1	QIJ96719.1	QVN46485.1	ON428226.2	MN873572.2	KY385304.1	KJ789138.1	AB093600.1	OL742438.1
Genome(nt)	58.3	69.6	53.1	53.9	75.6	59.3	59.1	58	57.1	57	59.9
ORF(aa)	55.8	75.7	47.6	48.1	83.6	56.8	56.9	56.3	54	55.3	59.1
P1(aa)	14.5	54	14.1	18.5	53.2	14.9	14.5	22.2	19.8	19	20.6
HC-Pro(aa)	57.9	71.1	46.3	46.9	79.4	59.9	60.3	59.4	54.2	55.5	61
P3(aa)	35.4	64.1	25.8	25.5	78.6	37.1	38.8	28.4	27.5	27.2	37.4
6K1(aa)	57.7	82.7	42.3	42.3	90.4	65.4	67.3	61.5	65.4	55.8	51.9
CI(aa)	62.5	80.8	55.7	55.7	89.9	63.6	63.6	63.2	60.9	63.7	68
6K2(aa)	50.9	58.5	41.5	41.5	77.4	50.9	50.9	47.2	45.3	43.4	45.3
Vpg(aa)	60.3	79.4	51.9	53.4	84.7	60.3	60.8	59.8	57.7	59.3	61.9
NIa(aa)	61.3	83.1	52.7	52.7	90.5	60.9	60.9	61.3	56.4	63.4	63.8
NIb(aa)	68.8	83.4	58.3	60.2	89.9	69	68.6	65.9	67.4	67.3	69.2
CP(aa)	68.3	86.9	61	59.8	91.5	69.1	68.3	74.5	72.6	72.2	74.1

## Sheet: Table S8
Table S8	Comparison of nucleotide sequences and polyprotein aa sequences between PMaV1-D1,PMaV1-D2 and other potyviruses
	A: PMaV1-D1,B: PMaV1-D2
A
Scientific Name	Percent Identity（nt）	Query Cover（nt）	Scientific Name	Percent Identity（aa）	Query Cover（aa）
Polygonatum mosaic-associated virus 1 （OP380926.1）	0.976	0.98	Polygonatum mosaic-associated virus 1 （WBQ86004.1）	0.9883	0.95
Polygonatum kingianum virus 4（MK427054.1）	0.7688	0.86	Polygonatum kingianum virus 3（QIJ96722.1）	0.7923	0.95
Peace lily mosaic virus （DQ851494.1 ）	0.7342	0.08	Polygonatum kingianum virus 4（QIJ96719.1）	0.7828	0.95
Basella rugose mosaic virus（MT364354.1 ）	0.7243	0.1	Gomphocarpus mosaic virus（ YP_010086751.1）	0.5836	0.93
Yam mosaic virus(OL584358.1 )	0.7267	0.08	Pleione flower breaking virus（YP_009552772.1）	0.5824	0.93
Telosma mosaic virus(ON932196.1 )	0.7466	0.13	Keunjorong mosaic virus(YP_004934107.1）	0.5732	0.93
B
Scientific Name	Percent Identity（nt）	Query Cover（nt）	Scientific Name	Percent Identity（aa）	Query Cover（aa）
Polygonatum mosaic-associated virus 1 （OP380926.1）	0.9138	0.99	Polygonatum mosaic-associated virus 1 （WBQ86004.1）	0.9633	0.96
Soybean mosaic virus（FJ640969.1 ）	0.7169	0.08	Polygonatum kingianum virus 3（QIJ96722.1）	0.797	0.96
Watermelon mosaic virus（OM988081.1 ）	0.7674	0.03	Polygonatum kingianum virus 4（QIJ96719.1）	0.7902	0.96
Pleione flower breaking virus ( NC_040650.1 )	0.8065	0.02	Gomphocarpus mosaic virus（ YP_010086751.1）	0.5846	0.95
Leek yellow stripe virus(MN059489.1)	0.729	0.06	Pleione flower breaking virus（YP_009552772.1）	0.5787	0.96
Watermelon mosaic virus(KM527488.1)	0.745	0.04	Keunjorong mosaic virus(YP_004934107.1）	0.5776	0.94

## Sheet: Table S9
Table S9	Comparison of polyprotein aa sequences between DpLV and other Lispiviridae
Scientific Name	Percent Identity（aa）	Query Cover（aa）
Maize suscal virus（UWX11517.1）	0.3459	0.8
Wuchang romanomermis nematode virus 2（YP_009342285.1）	0.2837	0.47
Wuchang romanomermis nematode virus 2（UUG74179.1）	0.2819	0.47
Cat Tien Hospitalitermes Lispi-like virus（UUW06592.1）	0.2862	0.46
Hemipteran arli-related virus OKIAV95( YP_010800926.1）	0.2514	0.49
Fuyun tick virus 1(UXL90888.1）	0.2785	0.46

## Sheet: Table S10
Table S10	Pairwise nucleotide sequence（lower half） and （ top half）polyprotein aa complete sequences comparisons for nine Potyviruses , %.
	PMaV1	PMaV1-D1	PMaV1-D2	PKgV3	PKgV4	DCSV	PKgV5	PKgV2	PKgV1
PMaV1		98.3	96.7	80.8	80.3	47.8	47.5	47.8	46.5
PMaV1-D1	91.4		95.3	81	80.5	47.9	48	48.3	47
PMaV1-D2	97.9	89.3		80.3	79.8	47.3	47.2	47.4	46.5
PKgV3	72.6	72.4	72.6		82.5	47.4	48	48.4	46.5
PKgV4	72	71.7	71.8	73.2		47.9	48.2	48.6	47.3
DCSV	55	54.7	55.2	55.7	55.8		83.3	75.4	55.9
PKgV5	53.4	55.3	55	53.6	53.9	75		75.8	56.6
PKgV2	54.8	53.6	55.1	53.8	53.9	69	69.8		56.5
PKgV1	54.8	52.8	55	53.2	53.1	59.6	59.8	59.2

[truncated: 2 more sheets: Table S11, Table S12]
